# Supplementary material
Source: PubMed Central journal article supplement (PMC5768662)
Supplement: mmc1.pdf [file mmc1.pdf]

**YMTHE, Volume 25**

## **Supplemental Information**

### **Epigenetic Modification of MicroRNA-200b**

#### **Contributes to Diabetic Vasculopathy**

**Kanhaiya Singh, Durba Pal, Mithun Sinha, Subhadip Ghatak, Surya C. Gnyawali, Savita Khanna, Sashwati Roy, and Chandan K. Sen**

# Supplementary Figure 1

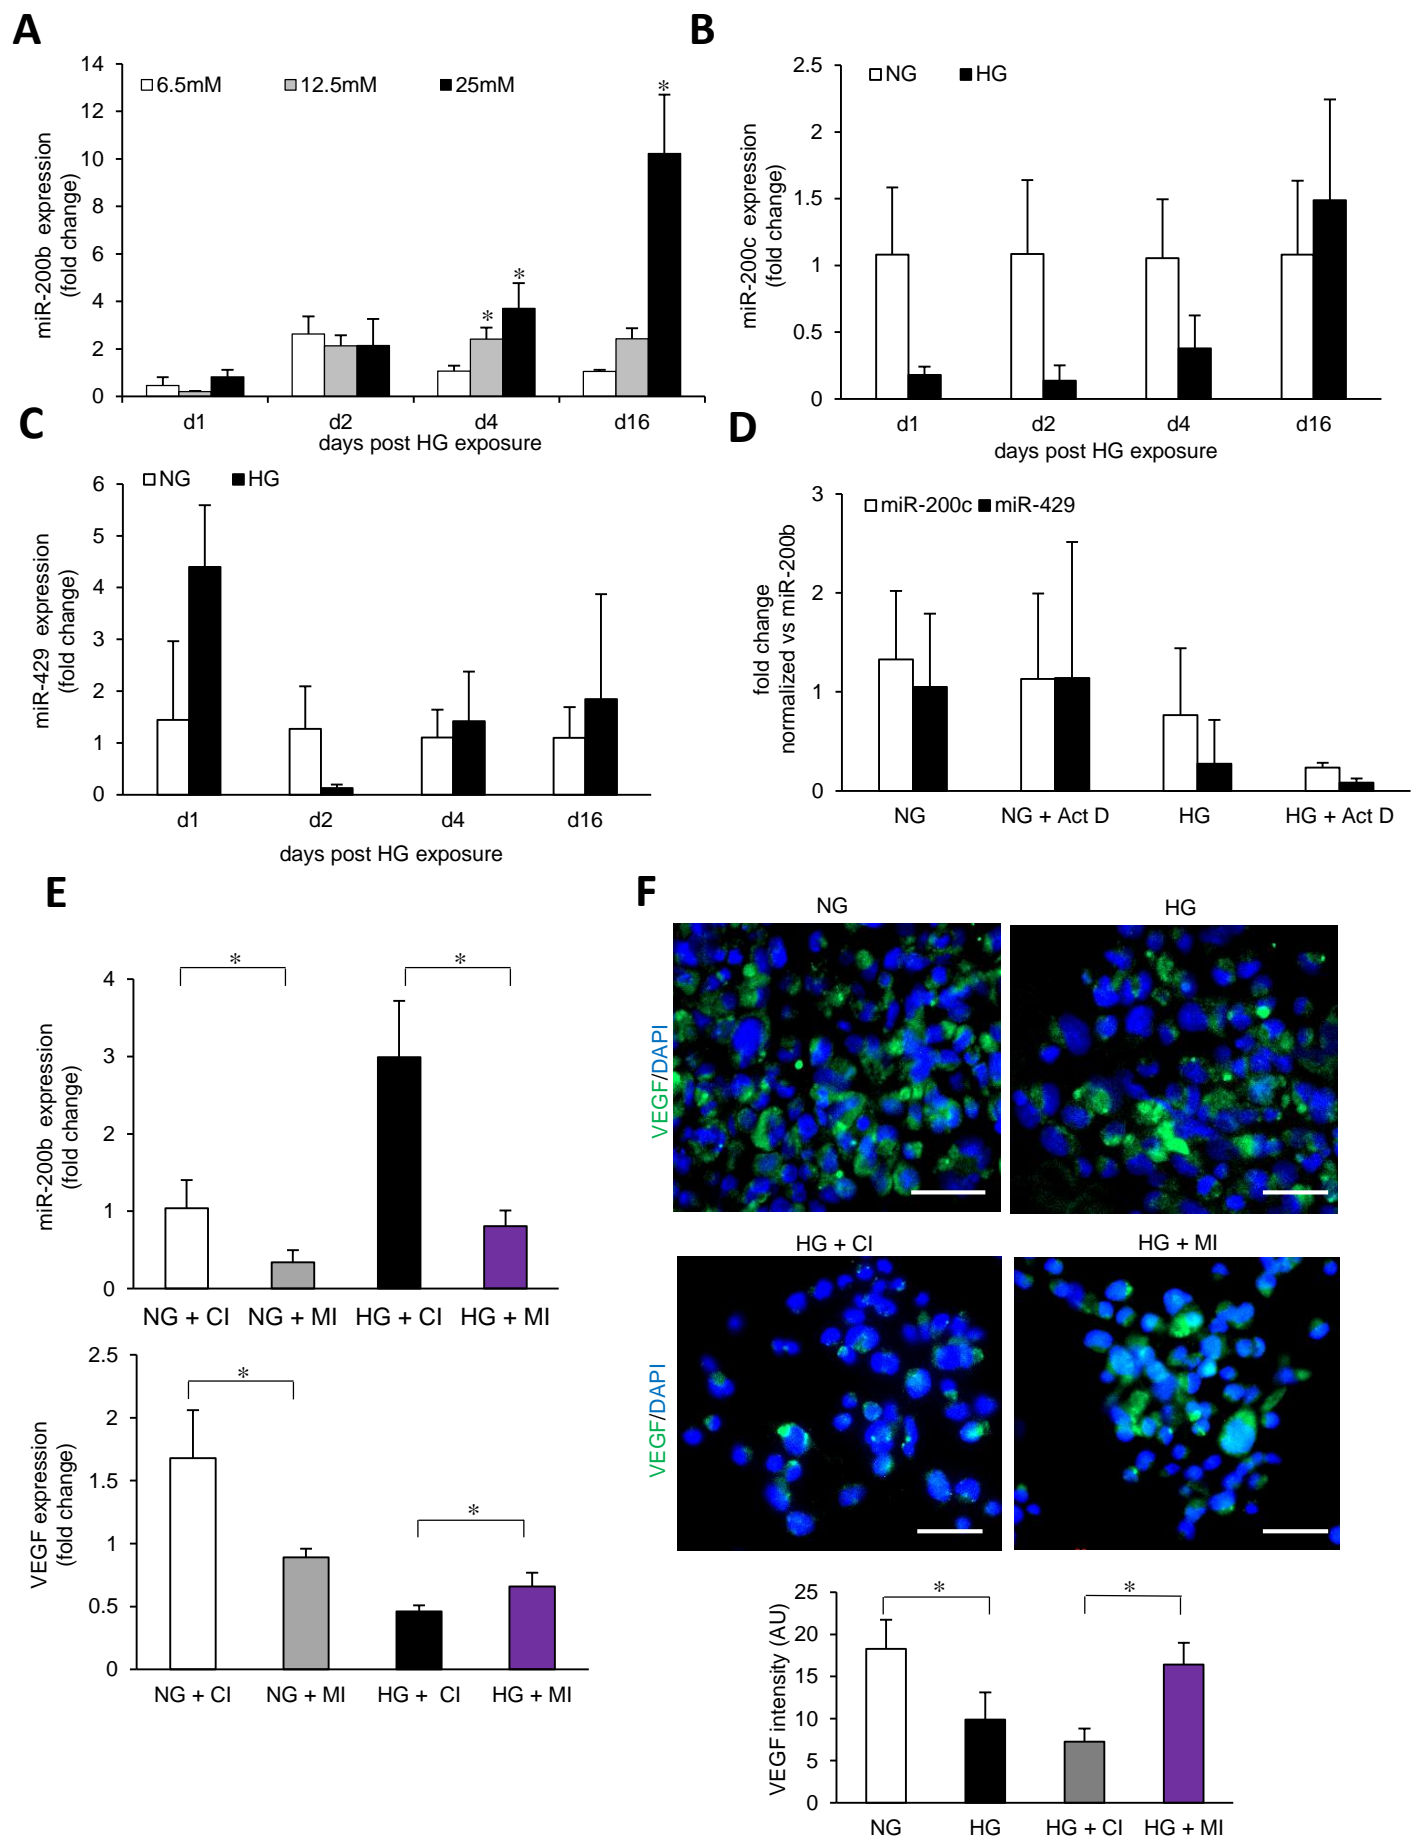

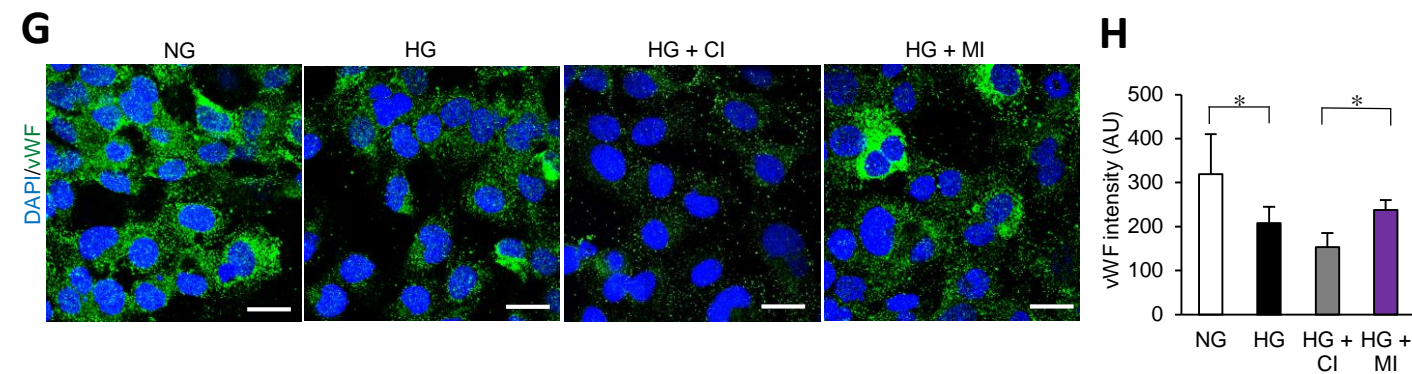

**Supplementary Figure 1: Elevated miR-200b in response to hyperglycemia caused endothelial cell dysfunction.**

**(A)** qRT-PCR analysis of miR-200b expression in HMEC as a function of time (d1-d16) and varying concentrations (6.25, 12.5 or 25 mM) after exposure to high glucose (HG) or normal glucose (NG) conditions for 16 days. N = 3,  $*p < 0.05$  (Student's t test). **(B)** qRT-PCR analysis of miR-200c expression in HMEC after exposure to HG/NG conditions for 16 days. N = 3 **(C)** qRT-PCR analysis of miR-429 expression in HMEC after exposure to HG/NG conditions for 16 days. N = 3 **(D)** qRT-PCR analysis of miR-200c and miR-429 expression in HMEC after exposure to HG/NG conditions for 4 days followed by actinomycin D treatment (2.5 $\mu$ g/ml, 4h). N = 5 **(E)** qRT-PCR analysis of miR-200b and VEGF expressions in HMEC after exposure to HG/NG conditions after cotreatment with control (CI) or miR-200b inhibitor (MI) for 4 days. N = 4,  $*p < 0.001$ , F = 31.82 (miR-200b); 49.51 (VEGF) (one way ANOVA) **(F)** Immunocytochemical analysis of VEGF expression in HMEC under NG/HG and cotreatment with control (CI) or miR-200b inhibitor (MI). N = 4,  $*p < 0.001$ , F = 14.56 (one way ANOVA). Scale bar, 100  $\mu$ m. **(G, H)** Immunocytochemical analysis of vWF expression in HMEC under NG/HG and cotreatment with control (CI) or miR-200b inhibitor (MI). Scale bar, 20  $\mu$ m. N = 3,  $*p < 0.05$ , F = 6.08 (one way ANOVA). Data represented as the mean  $\pm$  S.D.

# Supplementary Figure 2

## A

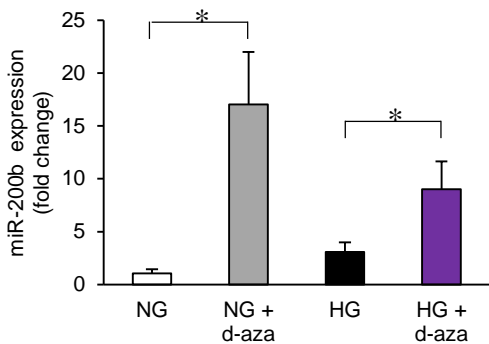

## B

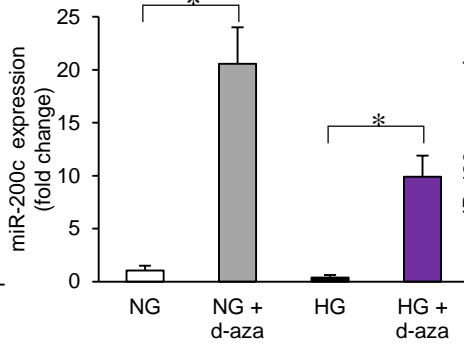

## C

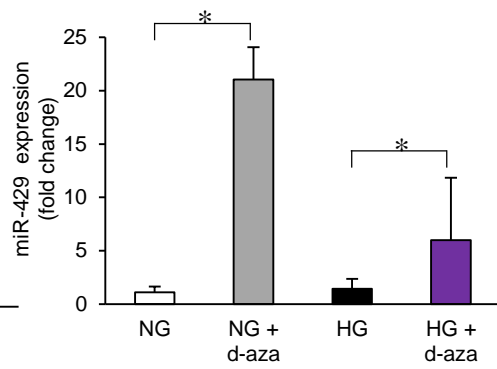

## D

miR-200b Promoter chr1: 1,162,627-1,163,083 Total CpG analyzed = 31

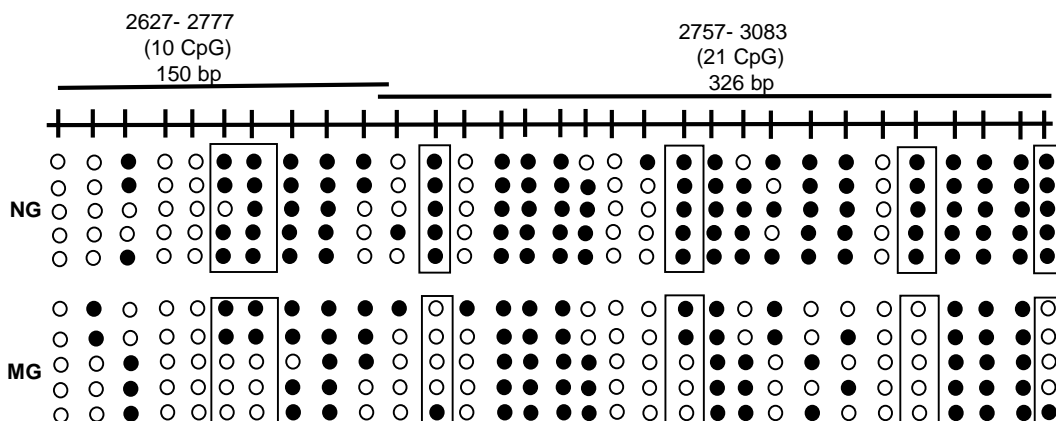

## E

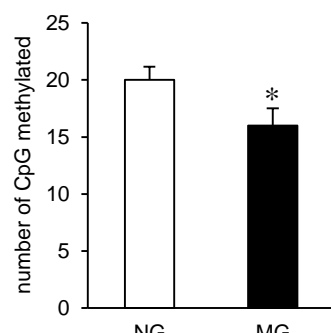

## F

miR-200c Promoter Total CpG analyzed = 8  
chr12: 6963144-6963307

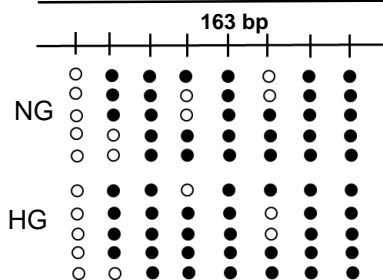

## G

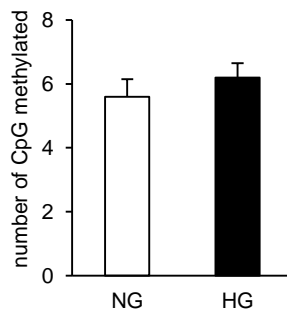

## H

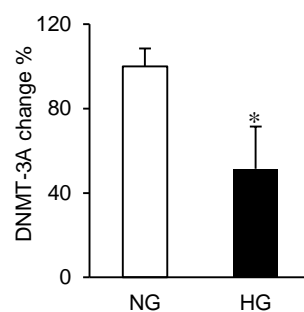

## I

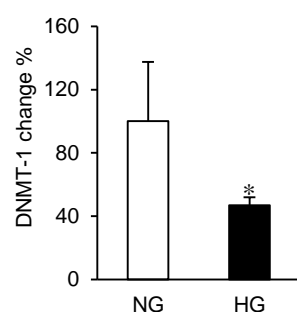

## J

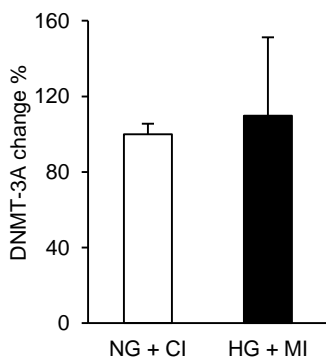

## K

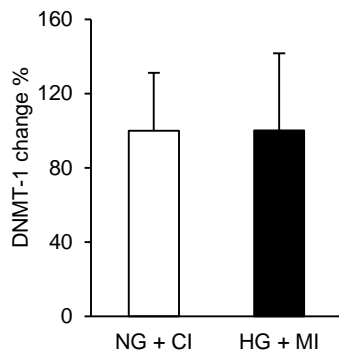

## L

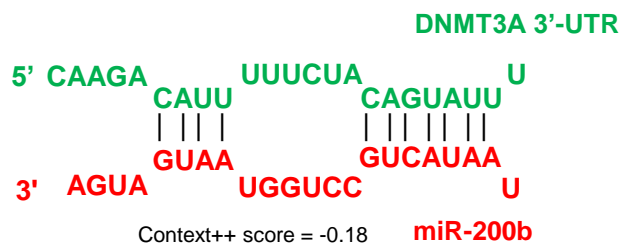

**M**

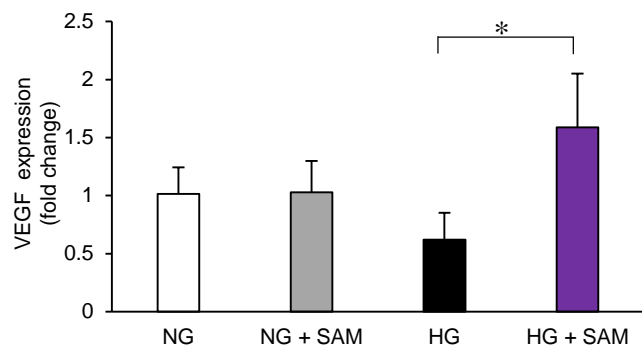

**N**

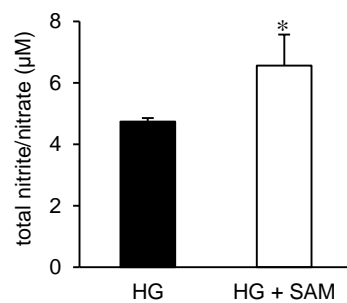

**O**

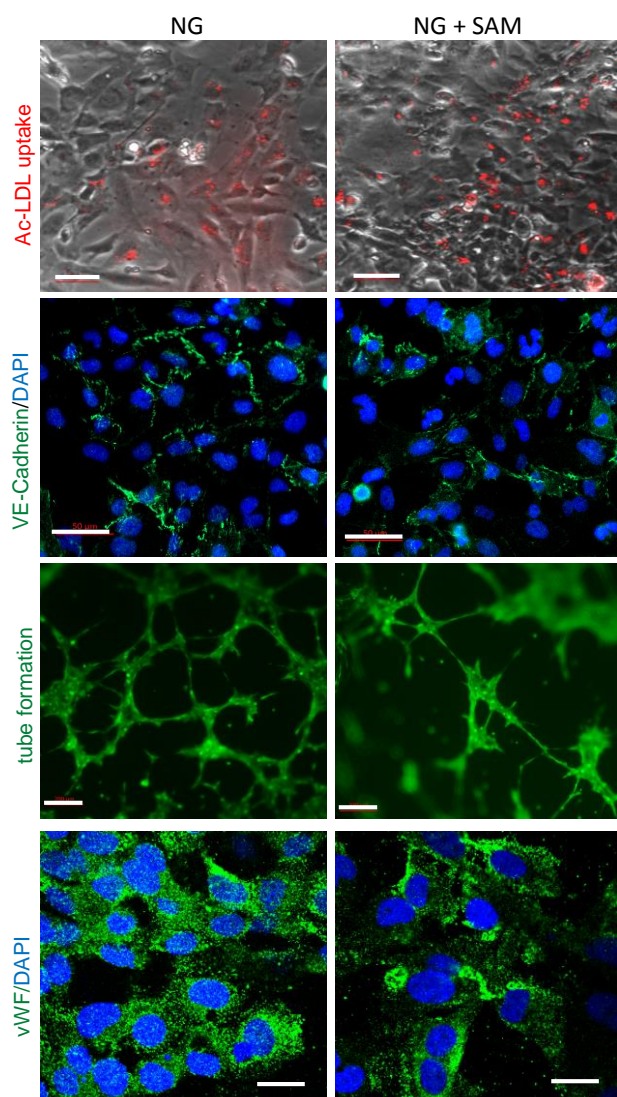

**P**

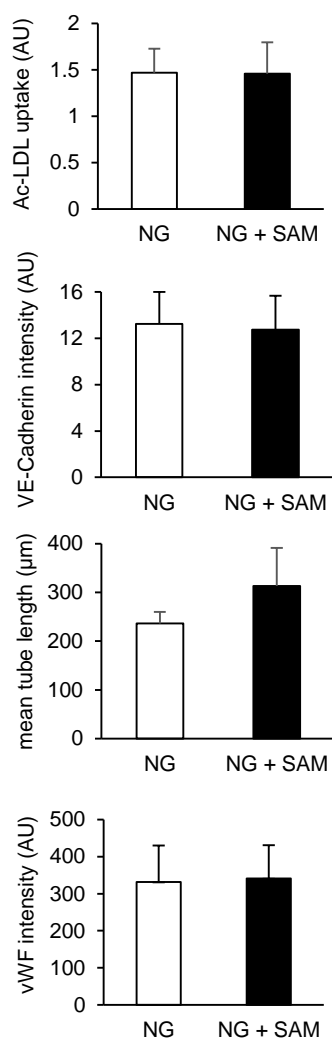

**Supplementary Figure 2: Methylation regulates the expression of miR-200 family genes.** (A - C) qRT-PCR analysis of miR-200b, miR-200c and miR-429 expression after 48 hr exposure to 5-Aza-2'-deoxycytidine (d-aza) under high glucose (HG) or cultured in normal glucose (NG) conditions. N = 3, \* $p < 0.05$  (one way ANOVA). (D) Schematic diagram showing the regions (1, 2) of miR-200b promoter analyzed through bisulfite genomic sequencing of DNA. Methylation profile of the miR-200b promoter in HMEC cultured in normal glucose (NG) or exposed to methylglyoxal (500  $\mu$ M, 48 h). (methylated CpG = black, unmethylated CpG = white). Number of clones = 5. (E) Total number of methylated CpG sites obtained from bisulfite sequencing analysis. N = 5, \* $p < 0.05$  (Student's t test). (F) Schematic diagram showing the region of miR-200c promoter analyzed by bisulfite genomic sequencing of DNA. (G) Methylation profile of the miR-200c gene promoter is shown under HG/NG conditions (methylated CpG = black, unmethylated CpG = white). (H) Nuclear DNMT3A protein and (I) DNMT1 protein expression analysis in NG/HG exposed HMEC. N = 3, \* $p < 0.05$  (Student's t test). (J) Nuclear DNMT1 and (K) DNMT3A protein expression analysis in NG/HG condition after treatment with control (CI) or miR-200b inhibitor (MI). N = 3 (L) Schematic representation of the alignment of the DNMT3A mRNA depicting the miR-200b binding site in its 3'-UTR (position in UTR: 709-715; Context score = - 0.18). Top strand, DNMT3A mRNA; bottom strand, miR-200b. (M) qRT-PCR analysis of VEGF expression in HMEC administered with S-Adenosyl methionine (SAM) administration in NG/HG condition after treatment with control (CI) or miR-200b inhibitor (MI). N = 5, \* $p < 0.05$ , F = 7.39 (one way ANOVA). (N) Total nitrate/nitrite production in HMEC after SAM treatment in HG condition. N = 5, \* $p < 0.05$  (Student's t test). Data represented as the mean  $\pm$  S.D. (O, P) Endothelial function analysis: ac-LDL uptake (upper panel, Scale bar, 50  $\mu$ m), VE-cadherin expression (middle panel, Scale bar, 50  $\mu$ m), matrigel tube length (middle panel, Scale bar, 200  $\mu$ m), and vWF expression (lower panel, Scale bar, 30  $\mu$ m) after SAM treatment in HG condition. N = 3,  $p > 0.05$  (Student's t test).

Supplementary Figure 3:

**A**

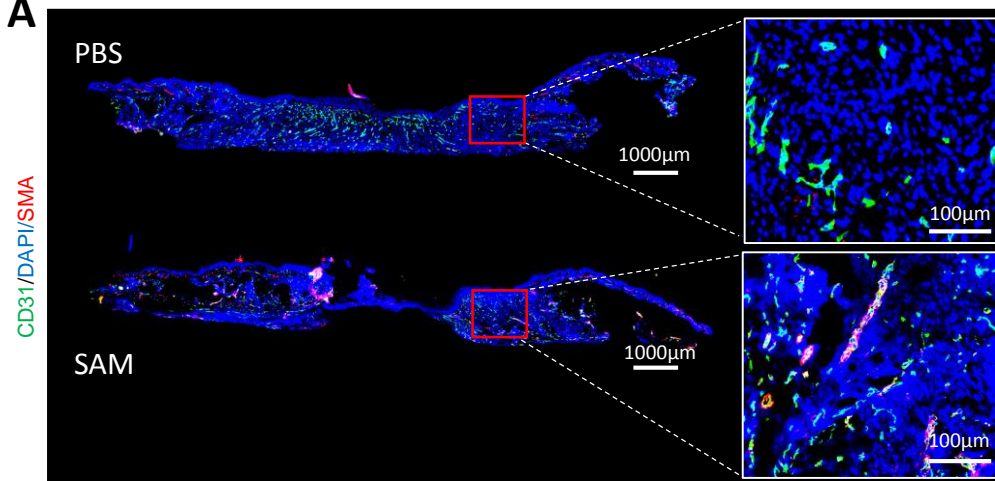

**B**

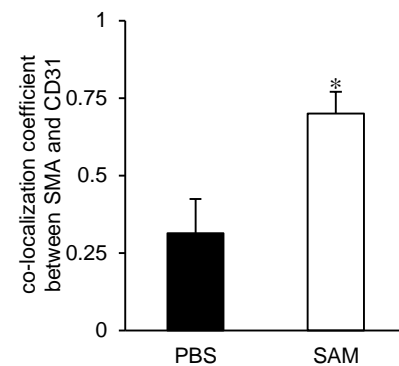

**C**

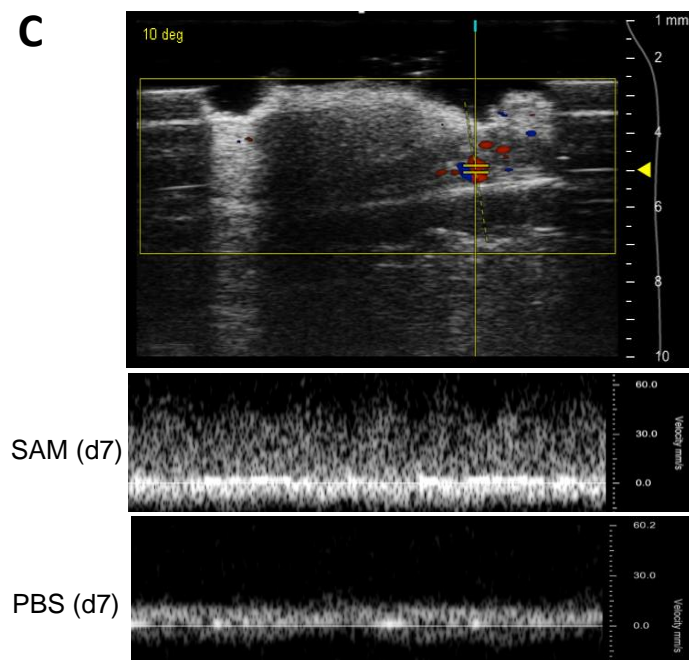

**D**

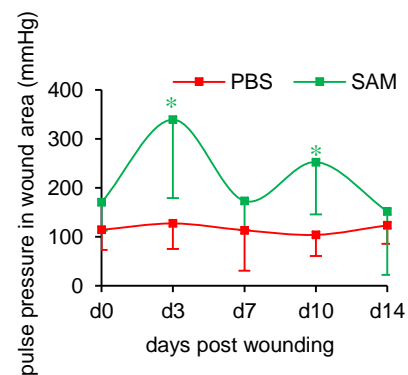

**E**

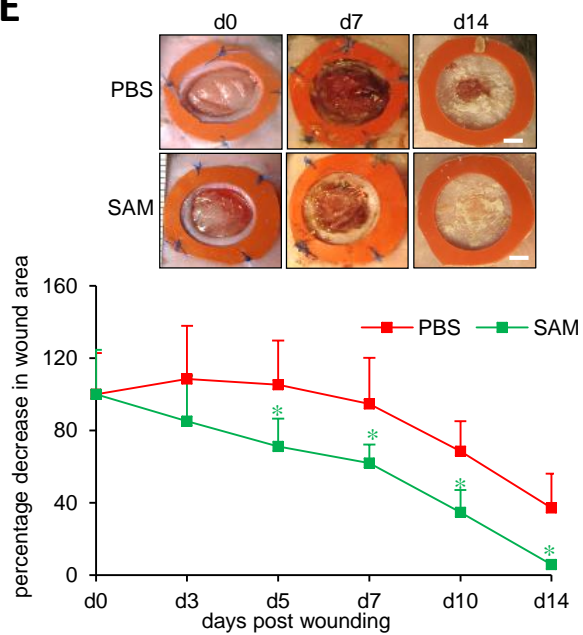

**F**

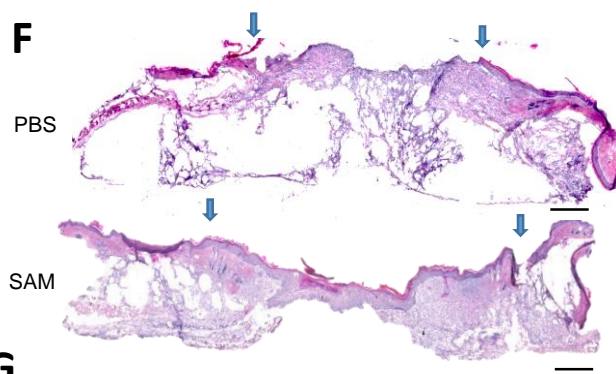

**G**

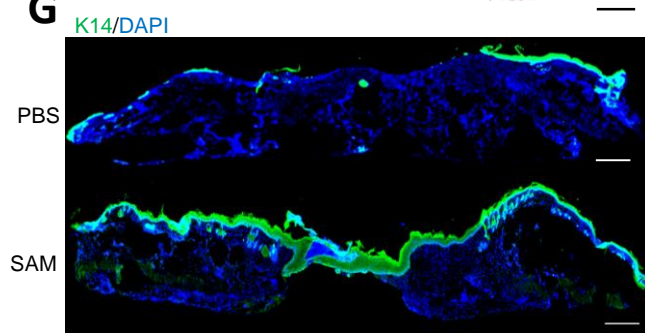

**H**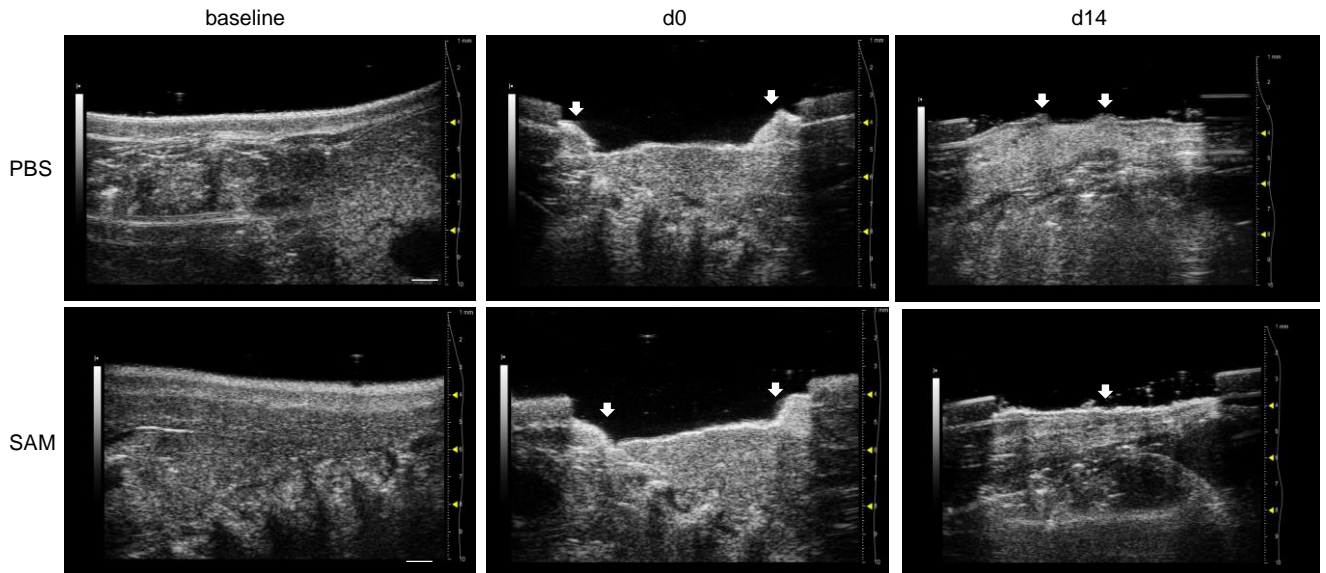

**Supplementary Figure 3: SAM restored vascular function in diabetic wounds.**

**(A - B)** Immunohistochemical analysis showing SMA<sup>+</sup>/CD31<sup>+</sup> co-expression in SAM administered diabetic wounds. N = 3, \*p< 0.05 (Student's t test). **(C - D)** Wound edge blood flow and pulse pressure was measured using color Doppler feature of Vevo-2100. N = 3, \*p< 0.05 on days 3 and 10 (Student's t test). **(E)** Wound closure was monitored on days 3, 5, 7, 10 and 14 days post-wounding after treatment with SAM or PBS by digital planimetry and was presented as percentage of wound closure. N = 3, \*p< 0.05 on days 5, 7, 10 and 14 (Student's t test). **(F)** Representative images of formalin-fixed paraffin-embedded biopsy tissue sections (10 μm) of diabetic wounds (day 14) stained using hematoxylin (blue) and eosin (red), and **(G)** immunostained with anti-keratin-14 (green) and DAPI (blue). Scale bar, 200 μm. **(H)** *In vivo* wound imaging using Vevo-2100 for monitoring wound contraction and re-epithelialization in SAM treated (lower panels) or placebo (upper panels) diabetic wounds. Scale bar, 1 mm. Data represented as the mean ± S.D.



# Supplementary Figure 4

## A

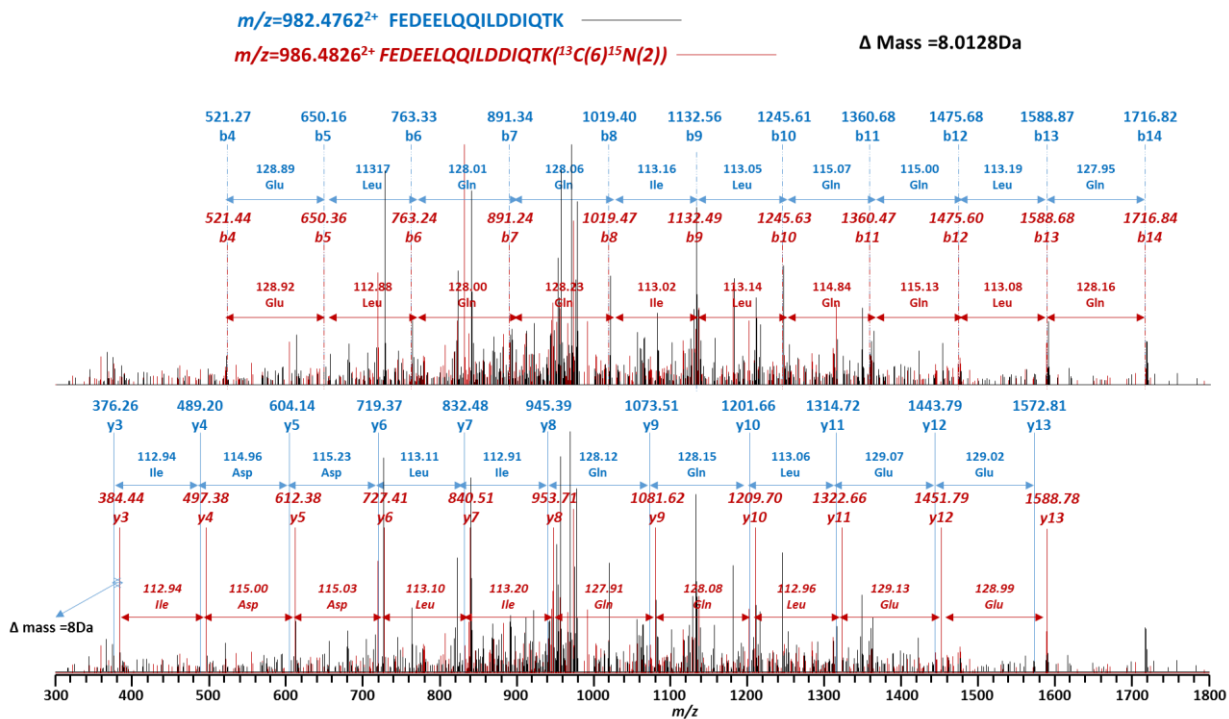

## B

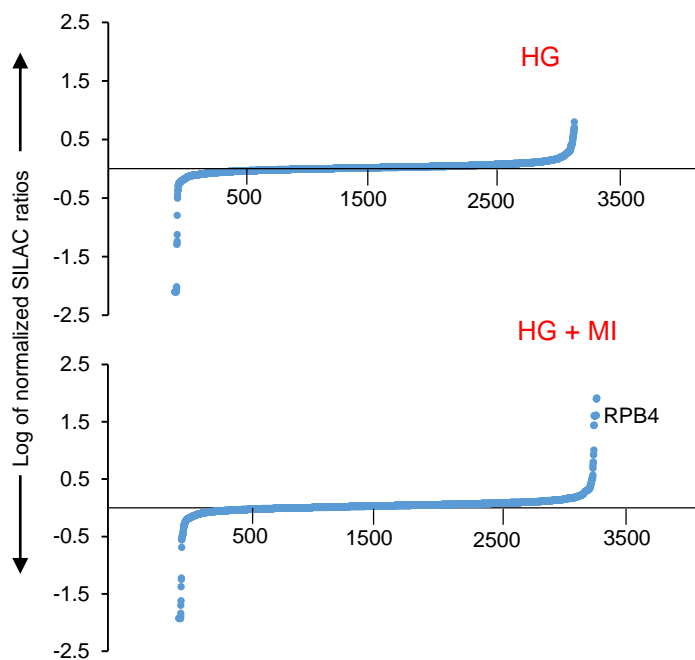

# Supplementary Figure 4

**C**

## PANTHER Protein Class

Total # Genes: 338 Total # protein class hits: 317

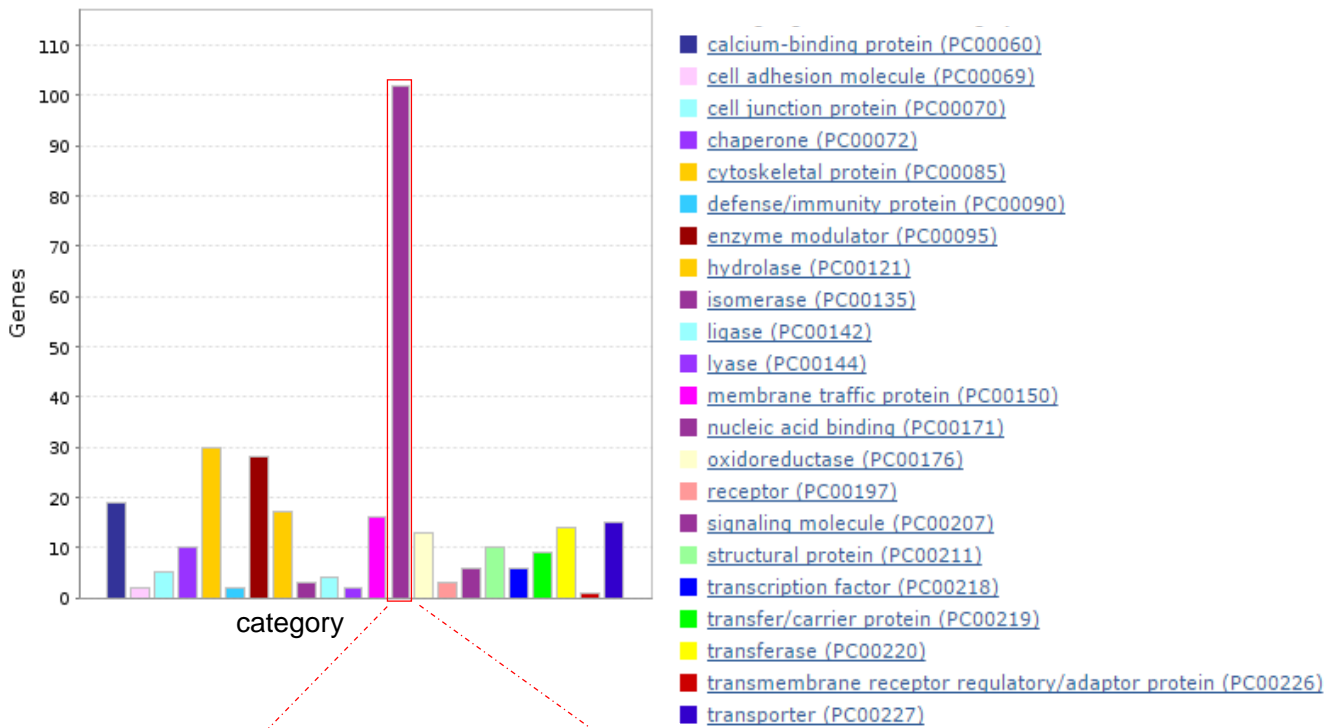

## PANTHER Protein Class

Level 1: nucleic acid binding (PC00171)

Total # Genes: 102 Total # protein class hits: 101

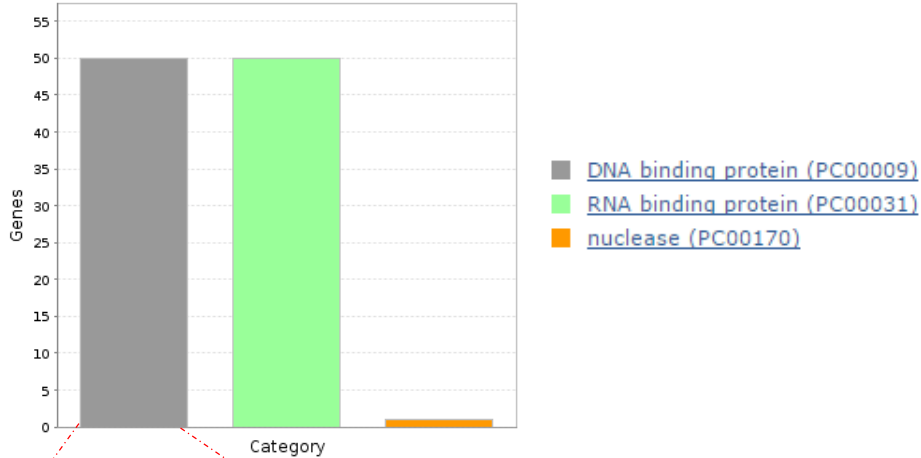

## PANTHER Protein Class

Level 1: nucleic acid binding (PC00171)

Level 2: DNA binding protein (PC00009)

Total # Genes: 50 Total # protein class hits: 45

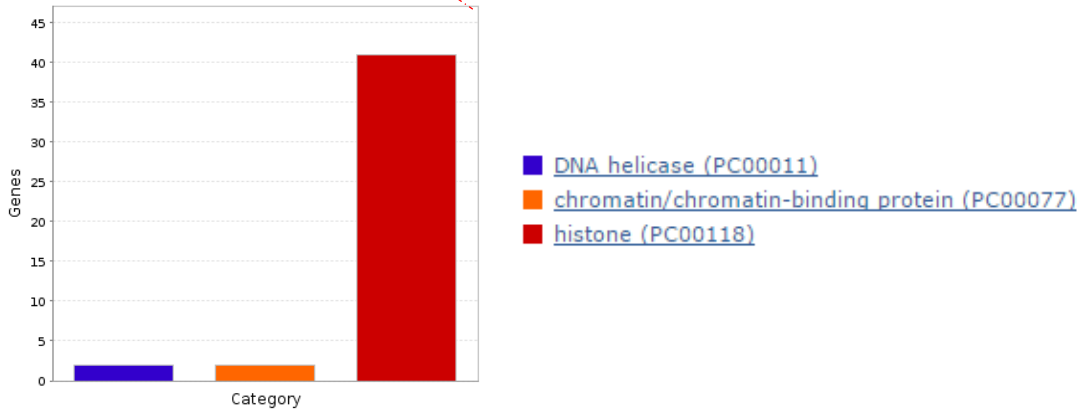

**D**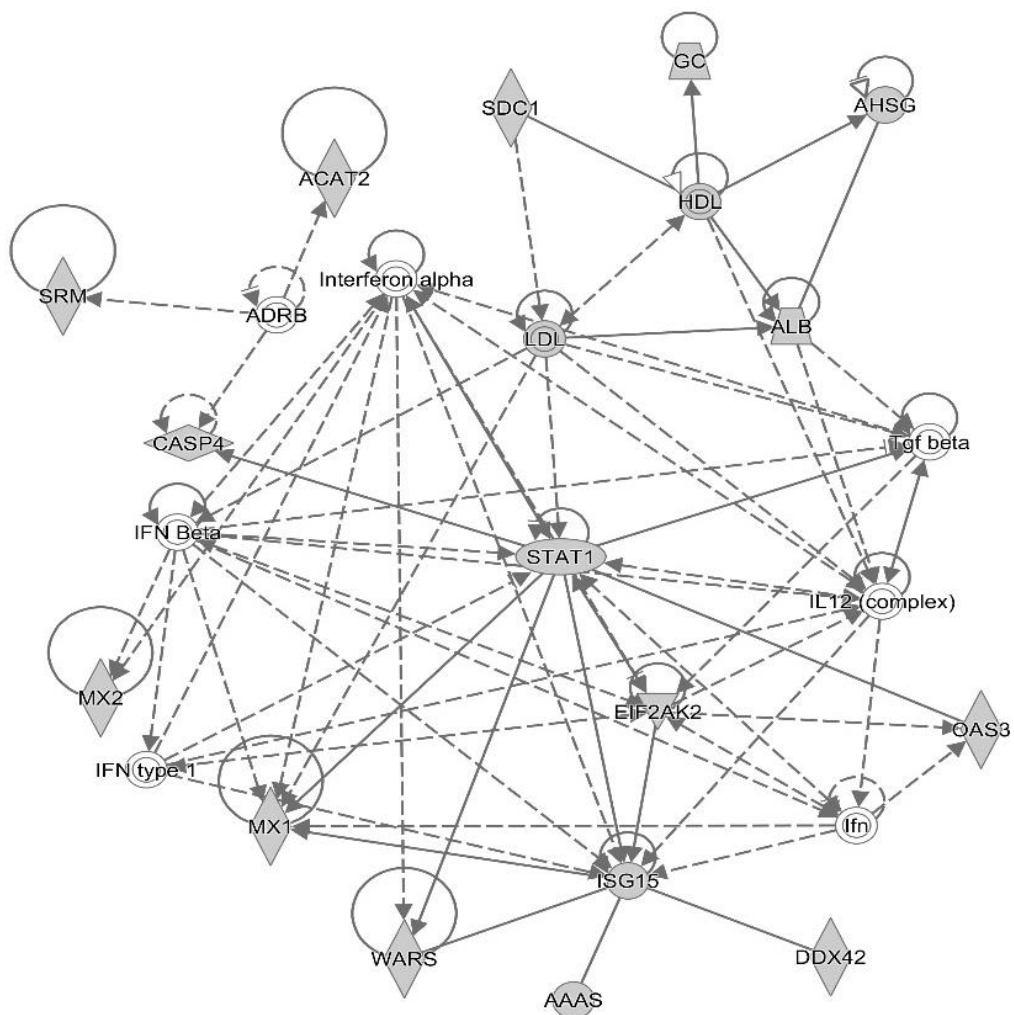**E**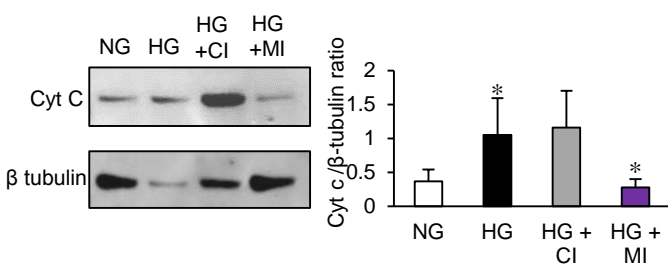**F**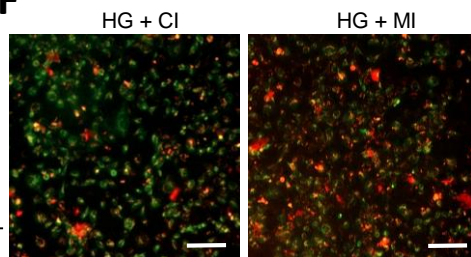**G**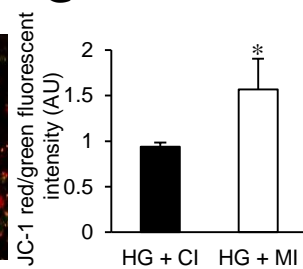

Supplementary Figure 4

**H**

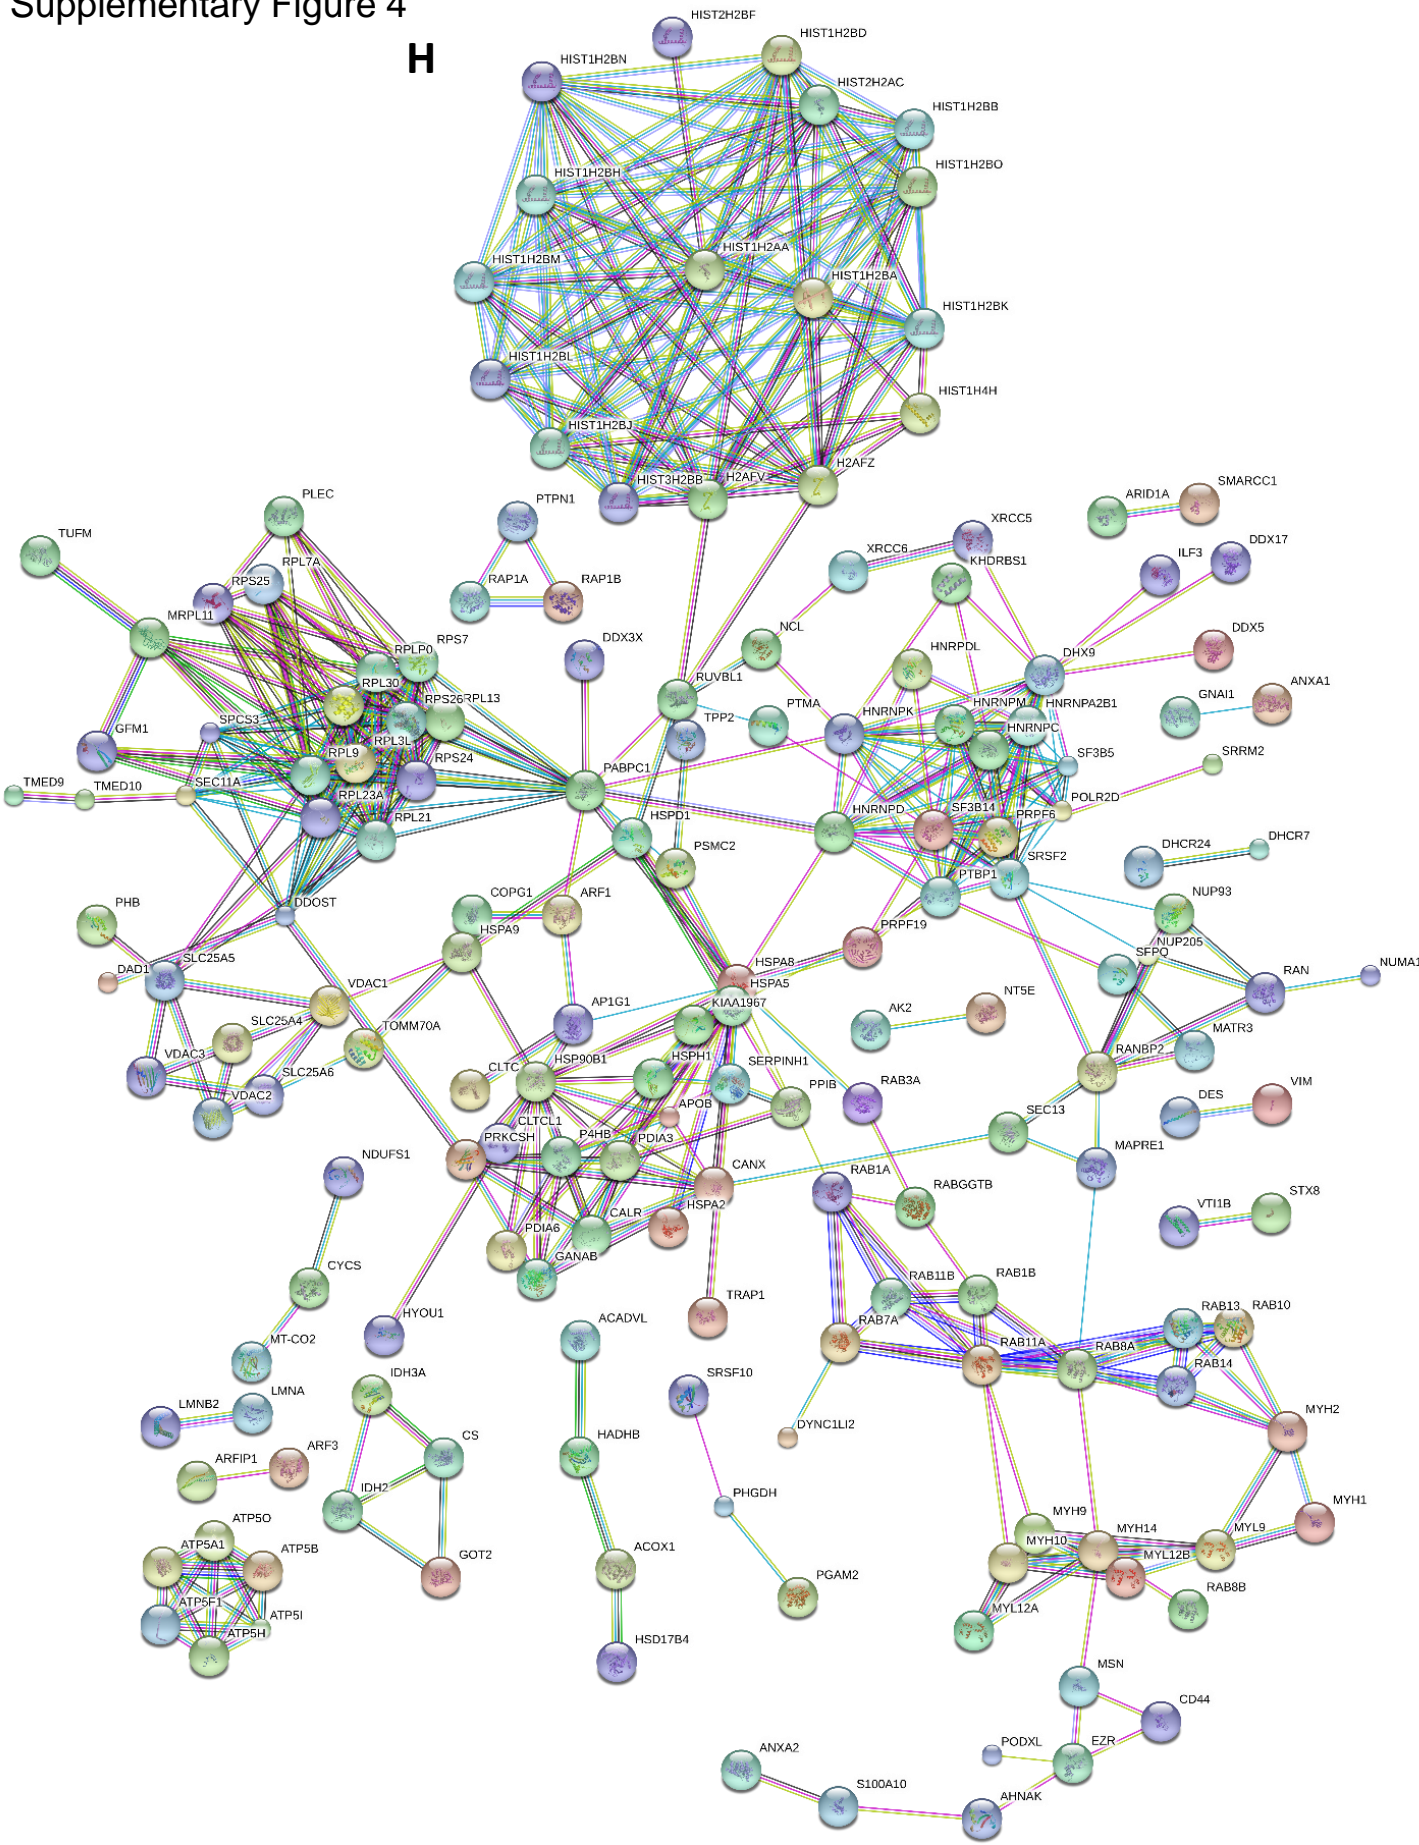

**Supplementary Figure 4: Proteomic identification of candidates and pathways responsive to miR-200b inhibition during hyperglycemia.** **(A)** MSMS mass Spectra of peptides FEDEELQQILDDIQTK (black) and FEDEELQQILDDIQTK (13C(6)15N(2))(red), a mass difference of 8 Da was observed between the  $y$  ions generated from heavy and light isotopic labeled peptides. **(B)** Normalized log ratio distribution of all quantitated proteins. **(C)** Functional classification of genes significantly upregulated due to inhibition of miR-200b in HG microenvironment. The bar graphs shown below represents the proportion of each functional group and the total number of genes in each group. **(D)** Ingenuity pathway analysis (IPA) showing that pathway of downregulated proteins due to inhibition of miR-200b in HG microenvironment. **(E)** Western blot analysis of cellular cytochrome C release from HMEC under NG/HG and co-treatment with control (CI) or miR-200b inhibitor (MI).  $N = 3$  \* $p < 0.05$  (Student's t test). **(F, G)** Mitochondrial potential using JC-1 dye in HMEC under HG conditions and co-treatment with control (CI) or miR-200b inhibitor (MI). Scale bar, 100  $\mu\text{m}$ .  $N = 3$  \* $p < 0.05$  (Student's t test). Data represented as the mean  $\pm$  S.D. **(H)** STRING version 10.0 was used to construct protein-protein interaction network of significantly upregulated proteins in HMEC under HG conditions and cotreatment with miR-200b inhibitor (MI). Lines or strings are indicative of protein interactions. Proteins with no interacting partners were omitted.

## **Supplementary Table:**

1. Total proteins identified after SILAC labeling in hyperglycemia (HG) and HG + miR-200b inhibitor and their abundance ratios.
2. Upregulated proteins after miR-200b inhibition in HMEC (p value < 0.05; % change > 10%)
3. Down-regulated proteins after miR-200b inhibition in HMEC (p value < 0.05; % change > 10%)
4. Table showing functional classification of upregulated proteins after miR-200b inhibition during hyperglycemia using ingenuity pathway analysis
5. PFAM domain based network analysis of upregulated proteins after miR-200b inhibition during hyperglycemia using Search Tool for the Retrieval of INteracting Genes/ proteins (STRING).
6. Functional network analysis of upregulated proteins after miR-200b inhibition during hyperglycemia using Ingenuity Pathways Analysis (IPA).
7. Functional network analysis of down-regulated proteins after miR-200b inhibition during hyperglycemia using Ingenuity Pathways Analysis (IPA).
8. Table showing proteins upregulated through SILAC quantitative proteomics after miR-200b inhibition during hyperglycemia exposure which are also supported by established predictive computational algorithms miRalyze and TargetScan.
9. Table showing clinical and demographic details of the human subjects included in the study.

**Supplementary Table 4:**

| © 2000-2016 QIAGEN. All rights reserved.                                     |               |        |                                                                              |
|------------------------------------------------------------------------------|---------------|--------|------------------------------------------------------------------------------|
| Ingenuity Toxicity Lists                                                     | -log(p-value) | Ratio  | Molecules                                                                    |
| Mitochondrial Dysfunction                                                    | 4.78          | 0.0568 | ATP5H,ATP5B,ATP5A1,ATP5O,CYCS,VDAC3,VDAC1,ATP5F1,ATP5I,VDAC2                 |
| Fatty Acid Metabolism                                                        | 2.85          | 0.0513 | ACSL3,ACADVL,IWS1,ACOX1,HADHB,HSD17B4                                        |
| Cardiac Hypertrophy                                                          | 2.67          | 0.0276 | SLC25A4,RAB1A,RAB4A,RAB2A,NT5E,MYH14,SERPINE1,H2AFZ,DES,ATP2A2,EEF1D,S100A10 |
| Cholesterol Biosynthesis                                                     | 1.93          | 0.125  | FDFT1,DHCR7                                                                  |
| Increases Transmembrane Potential of Mitochondria and Mitochondrial Membrane | 1.82          | 0.06   | ARID1A,PHB,CYCS                                                              |
| Decreases Depolarization of Mitochondria and Mitochondrial Membrane          | 1.5           | 0.0741 | VDAC1,ATP2A2                                                                 |
| Liver Necrosis/Cell Death                                                    | 1.49          | 0.0242 | SPTBN1,SLC25A4,SERPINH1,PTPN1,HSPD1,SERPINE1,SLC25A5                         |
| Increases Renal Proliferation                                                | 1.24          | 0.0288 | UBE2M,LARP1,HSPD1,VDAC1                                                      |
| Mechanism of Gene Regulation by Peroxisome Proliferators via PPAR $\alpha$   | 1.11          | 0.0316 | ACOX1,MRPL11,HSD17B4                                                         |
| Increases Permeability Transition of Mitochondria and Mitochondrial Membrane | 1.09          | 0.125  | FAM162A                                                                      |
| Primary Glomerulonephritis Biomarker Panel (Human)                           | 0.963         | 0.0909 | SERPINE1                                                                     |
| Increases Liver Hepatitis                                                    | 0.937         | 0.0357 | SERPINE1,CYR61                                                               |
| PPAR $\alpha$ /RXR $\alpha$ Activation                                       | 0.911         | 0.022  | HSP90B1,PDIA3,ACOX1,GOT2                                                     |
| Increases Liver Damage                                                       | 0.909         | 0.0256 | PTPN1,CD44,SERPINE1                                                          |
| Decreases Transmembrane Potential of Mitochondria and Mitochondrial Membrane | 0.878         | 0.0248 | SLC25A6,IMMT,VDAC1                                                           |
| Recovery from Ischemic Acute Renal Failure (Rat)                             | 0.865         | 0.0714 | COL4A1                                                                       |
| Increases Bradycardia                                                        | 0.837         | 0.0667 | CALR                                                                         |
| Swelling of Mitochondria                                                     | 0.837         | 0.0667 | DES                                                                          |
| Cardiac Necrosis/Cell Death                                                  | 0.804         | 0.0183 | CALR,PHB,MANF,HSPD1,CYR61                                                    |
| Renal Glomerulus Panel (Human)                                               | 0.787         | 0.0588 | PODXL                                                                        |
| Hypoxia-Inducible Factor Signaling                                           | 0.782         | 0.0286 | P4HB,UBE2M                                                                   |
| Increases Depolarization of Mitochondria and Mitochondrial Membrane          | 0.765         | 0.0556 | CYR61                                                                        |
| Biogenesis of Mitochondria                                                   | 0.723         | 0.05   | RAB3A                                                                        |
| Glutathione Depletion - Phase II Reactions                                   | 0.723         | 0.05   | GSTK1                                                                        |
| Genes associated with Chronic Allograft Nephropathy (Human)                  | 0.704         | 0.0476 | COL4A1                                                                       |
| Increases Liver Steatosis                                                    | 0.611         | 0.022  | ATP5A1,CD44                                                                  |
| NRF2-mediated Oxidative Stress Response                                      | 0.598         | 0.0163 | HSP90B1,DNAJC9,PPIB,GSTK1                                                    |
| Positive Acute Phase Response Proteins                                       | 0.569         | 0.0333 | SERPINE1                                                                     |
| Renal Necrosis/Cell Death                                                    | 0.526         | 0.0135 | FDFT1,HSP90B1,GLS,CD44,CYCS,DDX17,VDAC1                                      |
| Cardiac Fibrosis                                                             | 0.487         | 0.0155 | SERPINE1,DES,ATP2A2                                                          |
| Increases Cardiac Proliferation                                              | 0.41          | 0.0213 | RAB1A                                                                        |
| Acute Renal Failure Panel (Rat)                                              | 0.321         | 0.0161 | CD44                                                                         |
| LPS/IL-1 Mediated Inhibition of RXR Function                                 | 0.308         | 0.0119 | ACSL3,ACOX1,GSTK1                                                            |
| Aryl Hydrocarbon Receptor Signaling                                          | 0.305         | 0.0126 | HSP90B1,GSTK1                                                                |
| Increases Renal Damage                                                       | 0.242         | 0.0123 | CD44                                                                         |
| RAR Activation                                                               | 0.228         | 0.0105 | ARID1A,RDH11                                                                 |
| TGF- $\beta$ Signaling                                                       | 0.214         | 0.0111 | SERPINE1                                                                     |

Table showing functional classification of upregulated proteins after miR-200b inhibition during hyperglycemia using ingenuity pathway analysis

**Supplementary Table 5:**

| <b>PFAM Protein Domains</b> |                                                         |                          |                             |
|-----------------------------|---------------------------------------------------------|--------------------------|-----------------------------|
| <b>pathway ID</b>           | <b>pathway description</b>                              | <b>count in gene set</b> | <b>false discovery rate</b> |
| PF00071                     | Ras family                                              | 22                       | 1.06E-15                    |
| PF00125                     | Core histone H2A/H2B/H3/H4                              | 17                       | 6.57E-15                    |
| PF00076                     | RNA recognition motif. (a.k.a. RRM, RBD, or RNP domain) | 13                       | 1.67E-05                    |
| PF00038                     | Intermediate filament protein                           | 5                        | 6.29E-05                    |
| PF00012                     | Hsp70 protein                                           | 4                        | 0.000419                    |
| PF00769                     | Ezrin/radixin/moesin family                             | 3                        | 0.00549                     |
| PF04732                     | Intermediate filament head (DNA binding) region         | 3                        | 0.00549                     |
| PF00191                     | Annexin                                                 | 3                        | 0.0119                      |
| PF00270                     | DEAD/DEAH box helicase                                  | 5                        | 0.0245                      |
| PF09379                     | FERM N-terminal domain                                  | 3                        | 0.0296                      |
| PF09380                     | FERM C-terminal PH-like domain                          | 3                        | 0.0296                      |
| PF00271                     | Helicase conserved C-terminal domain                    | 5                        | 0.047                       |
| PF01576                     | Myosin tail                                             | 2                        | 0.047                       |
| PF02736                     | Myosin N-terminal SH3-like domain                       | 2                        | 0.047                       |

PFAM domain based network analysis of upregulated proteins after miR-200b inhibition during hyperglycemia using Search Tool for the Retrieval of INteracting Genes/ proteins (STRING).



**Supplementary Table 6:**

| © 2000-2016 QIAGEN. All rights reserved. |                                                                                                      |                                             |                     |                         |                                   |
|------------------------------------------|------------------------------------------------------------------------------------------------------|---------------------------------------------|---------------------|-------------------------|-----------------------------------|
| Symbol                                   | Entrez Gene Name                                                                                     | GenPept/UniProt/<br>Swiss-Prot<br>Accession | Location            | Family                  | Entrez<br>Gene ID<br>for<br>Human |
| ATP5A1                                   | ATP synthase, H <sup>+</sup> transporting, mitochondrial F1 complex, alpha subunit 1, cardiac muscle | P25705                                      | Cytoplasm           | transporter             | 498                               |
| DDX39B                                   | DEAD-box helicase 39B                                                                                | Q13838                                      | Nucleus             | enzyme                  | 7919                              |
| DNAJC9                                   | DnaJ heat shock protein family (Hsp40) member C9                                                     | Q8WXX5                                      | Nucleus             | other                   | 23234                             |
| GOT                                      |                                                                                                      |                                             | Other               | group                   |                                   |
| GOT2                                     | glutamic-oxaloacetic transaminase 2                                                                  | P00505                                      | Cytoplasm           | enzyme                  | 2806                              |
| H2AFZ                                    | H2A histone family member Z                                                                          | P0C0S5                                      | Nucleus             | other                   | 3015                              |
| HIST1H2BA                                | histone cluster 1, H2ba                                                                              | Q96A08                                      | Nucleus             | other                   | 255626                            |
| HIST1H2BD                                | histone cluster 1, H2bd                                                                              | P58876                                      | Nucleus             | other                   | 3017                              |
| HIST1H2BJ                                | histone cluster 1, H2bj                                                                              | P06899                                      | Nucleus             | other                   | 8970                              |
| HIST1H2BK                                | histone cluster 1, H2bk                                                                              | O60814                                      | Nucleus             | other                   | 85236                             |
| HIST1H2BL                                | histone cluster 1, H2bl                                                                              | Q99880                                      | Nucleus             | other                   | 8340                              |
| HIST2H2AC                                | histone cluster 2, H2ac                                                                              | Q16777                                      | Nucleus             | other                   | 8338                              |
| HSPA1L                                   | heat shock protein family A (Hsp70) member 1 like                                                    | P34931                                      | Cytoplasm           | other                   | 3305                              |
| HSPA2                                    | heat shock protein family A (Hsp70) member 2                                                         | P54652                                      | Cytoplasm           | other                   | 3306                              |
| HSPA5                                    | heat shock protein family A (Hsp70) member 5                                                         | P11021                                      | Cytoplasm           | enzyme                  | 3309                              |
| HSPA8                                    | heat shock protein family A (Hsp70) member 8                                                         | P11142                                      | Cytoplasm           | enzyme                  | 3312                              |
| HSPA9                                    | heat shock protein family A (Hsp70) member 9                                                         | P38646                                      | Cytoplasm           | other                   | 3313                              |
| HSPD1                                    | heat shock protein family D (Hsp60) member 1                                                         | P10809                                      | Cytoplasm           | enzyme                  | 3329                              |
| MACF1                                    | microtubule-actin crosslinking factor 1                                                              | Q9UPN3                                      | Cytoplasm           | enzyme                  | 23499                             |
| MANF                                     | mesencephalic astrocyte derived neurotrophic factor                                                  | P55145                                      | Extracellular Space | other                   | 7873                              |
| MDH2                                     | malate dehydrogenase 2                                                                               | P40926                                      | Cytoplasm           | enzyme                  | 4191                              |
| NCEH1                                    | neutral cholesterol ester hydrolase 1                                                                | Q6PIU2                                      | Plasma Membrane     | enzyme                  | 57552                             |
| PCK2                                     | phosphoenolpyruvate carboxykinase 2, mitochondrial                                                   | Q16822                                      | Cytoplasm           | kinase                  | 5106                              |
| PSMC2                                    | proteasome 26S subunit, ATPase 2                                                                     | P35998                                      | Nucleus             | peptidase               | 5701                              |
| RPL23A                                   | ribosomal protein L23a                                                                               | P62750                                      | Cytoplasm           | other                   | 6147                              |
| RUVBL1                                   | RuvB like AAA ATPase 1                                                                               | Q9Y265                                      | Nucleus             | transcription regulator | 8607                              |
| SLC25A5                                  | solute carrier family 25 member 5                                                                    | P05141                                      | Cytoplasm           | transporter             | 292                               |
| TUFM                                     | Tu translation elongation factor, mitochondrial                                                      | P49411                                      | Cytoplasm           | translation regulator   | 7284                              |

Functional network analysis of upregulated proteins after miR-200b inhibition during hyperglycemia using Ingenuity Pathways Analysis (IPA).

## Supplementary Table 7:

| © 2000-2016 QIAGEN. All rights reserved. |                                                           |                                      |                     |                         |                          |
|------------------------------------------|-----------------------------------------------------------|--------------------------------------|---------------------|-------------------------|--------------------------|
| Symbol                                   | Entrez Gene Name                                          | GenPept/UniProt/Swiss-Prot Accession | Location            | Family                  | Entrez Gene ID for Human |
| AAAS                                     | aladin WD repeat nucleoporin                              | Q9NRG9                               | Nucleus             | other                   | 8086                     |
| ACAT2                                    | acetyl-CoA acetyltransferase 2                            | Q9BWD1                               | Cytoplasm           | enzyme                  | 39                       |
| AHSG                                     | alpha 2-HS glycoprotein                                   | P02765                               | Extracellular Space | other                   | 197                      |
| ALB                                      | albumin                                                   | P02768                               | Extracellular Space | transporter             | 213                      |
| CASP4                                    | caspase 4                                                 | P49662                               | Cytoplasm           | peptidase               | 837                      |
| DDX42                                    | DEAD-box helicase 42                                      | Q86XP3                               | Cytoplasm           | enzyme                  | 11325                    |
| EIF2AK2                                  | eukaryotic translation initiation factor 2 alpha kinase 2 | P19525                               | Cytoplasm           | kinase                  | 5610                     |
| GC                                       | GC, vitamin D binding protein                             | P02774                               | Extracellular Space | transporter             | 2638                     |
| HDL                                      |                                                           |                                      | Plasma Membrane     | complex                 |                          |
| lfn                                      |                                                           |                                      | Extracellular Space | group                   |                          |
| IFN Beta                                 |                                                           |                                      | Extracellular Space | group                   |                          |
| IFN type 1                               |                                                           |                                      | Other               | group                   |                          |
| IL12 (complex)                           |                                                           |                                      | Extracellular Space | complex                 |                          |
| Interferon alpha                         |                                                           |                                      | Extracellular Space | group                   |                          |
| ISG15                                    | ISG15 ubiquitin-like modifier                             | P05161                               | Extracellular Space | other                   | 9636                     |
| LDL                                      |                                                           |                                      | Plasma Membrane     | complex                 |                          |
| MX1                                      | MX dynamin like GTPase 1                                  | P20591                               | Cytoplasm           | enzyme                  | 4599                     |
| MX2                                      | MX dynamin like GTPase 2                                  | P20592                               | Nucleus             | enzyme                  | 4600                     |
| OAS3                                     | 2'-5'-oligoadenylate synthetase 3                         | Q9Y6K5                               | Cytoplasm           | enzyme                  | 4940                     |
| SDC1                                     | syndecan 1                                                | P18827                               | Plasma Membrane     | enzyme                  | 6382                     |
| SRM                                      | spermidine synthase                                       | P19623                               | Cytoplasm           | enzyme                  | 6723                     |
| STAT1                                    | signal transducer and activator of transcription 1        | P42224                               | Nucleus             | transcription regulator | 6772                     |
| Tgf beta                                 |                                                           |                                      | Extracellular Space | group                   |                          |
| WARS                                     | tryptophanyl-tRNA synthetase                              | P23381                               | Cytoplasm           | enzyme                  | 7453                     |

Functional network analysis of down-regulated proteins after miR-200b inhibition during hyperglycemia using Ingenuity Pathways Analysis (IPA)

### Supplementary Table 8:

|                                                      |
|------------------------------------------------------|
| <b>Protein name</b>                                  |
| Ras-related protein Rab-7a                           |
| heat shock protein family A (Hsp70) member 9 (HSPA9) |
| DnaJ homolog subfamily (HSP40)                       |
| ATP synthase                                         |
| collagen type IV                                     |
| ATP-dependent RNA helicase                           |
| Calumenin                                            |
| heterogeneous nuclear ribonucleoprotein              |
| talin 2                                              |
| cyclin-dependent kinase                              |

Table showing proteins upregulated through SILAC quantitative proteomics after miR-200b inhibition during hyperglycemia exposure which are also supported by established predictive computational algorithms miRalyze and TargetScan.

### Supplementary Table 9:

| <b>Parameter</b> | <b>Control</b>                         | <b>Diabetic</b>                        |
|------------------|----------------------------------------|----------------------------------------|
| Age (years)      | 53.66 ± 10.04                          | 49 ± 12.66                             |
| Gender           | M = 1; F = 2                           | M = 2; F = 1                           |
| Weight (lbs)     | 221 ± 40.11                            | 199.33 ± 33.57                         |
| HbA1c (%)        | n/a                                    | 6.46 ± 0.29                            |
| Ethnicity        | Not Hispanic or Latino = 3             | Not Hispanic or Latino = 3             |
| Race             | Caucasian = 3,<br>African American = 0 | Caucasian = 2,<br>African American = 1 |
| wound etiology   | pressure = 1; surgical = 2             | pressure = 1; surgical = 2             |
| infection status | non-infected =2, infected = 1          | non-infected =3, infected = 0          |

Table showing clinical and demographic details of the human subjects included in the study.
